# Supplementary material for: Resveratrol ameliorates 2,4-dinitrofluorobenzene-induced atopic dermatitis-like lesions through effects on the epithelium
Source: PeerJ. 2016 Mar 31;4:e1889. doi: 10.7717/peerj.1889 (PMC4824908; doi:10.7717/peerj.1889)
Supplement: Supplemental Information 1 [file peerj-04-1889-s001.xlsx]

## Sheet: Sheet1
5th week	6th week	Groups	Difference
,00	,00	1,00	,00
1,00	1,00	1,00	,00
,00	,00	1,00	,00
,00	,00	1,00	,00
1,00	1,00	1,00	,00
1,00	1,00	1,00	,00
1,00	1,00	1,00	,00
9,00	10,00	2,00	,00
8,00	9,00	2,00	1,00
8,00	9,00	2,00	,00
8,00	8,00	2,00	,00
8,00	9,00	2,00	1,00
9,00	8,00	2,00	-1,00
8,00	9,00	2,00	1,00
8,00	4,00	3,00	-4,00
8,00	7,00	3,00	-2,00
10,00	8,00	3,00	-2,00
8,00	4,00	3,00	-4,00
8,00	4,00	3,00	-4,00
8,00	4,00	3,00	-4,00
9,00	5,00	3,00	-4,00
